# Supplementary material for: Development of the long-term harmonized multi-satellite SIF (LHSIF) dataset at 0.05° resolution (1995–2024)
Source: Copernicus journal article supplement (doi:10.5194/essd-18-55-2026), 2026-01-05
Supplement: Supplementary file 1 [file essd-18-55-2026-supplement.pdf]

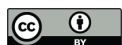

## *Supplement of*

# **Development of the long-term harmonized multi-satellite SIF (LHSIF) dataset at 0.05° resolution (1995–2024)**

**Chu Zou et al.**

*Correspondence to:* Liangyun Liu (liuly@radi.ac.cn)

The copyright of individual parts of the supplement might differ from the article licence.

Supplementary Materials

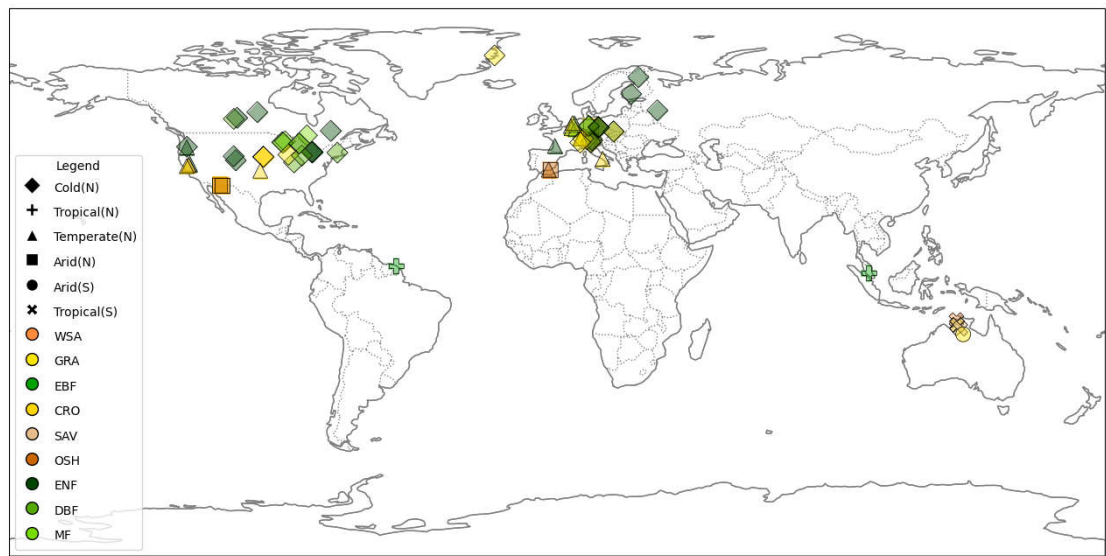

Figure S1 Global distribution of FLUXNET sites labeled by their climate zones and IGBP vegetation types.

Table S1 Information for the ChinaSpec sites

| Site_Name    | ID  | Location                 | Landcover Type                                | Time range* |
|--------------|-----|--------------------------|-----------------------------------------------|-------------|
| XiaoTangshan | XTS | 40.1786°N,<br>116.4432°E | Cropland (winter wheat<br>and maize rotation) | 2017–2023   |
| HuaiLai      | HL  | 40.3489°N,<br>115.7882°E | A mixture of grassland<br>and forest          | 2017–2023   |
| DaMan        | DM  | 38.8555°N,<br>100.3722°E | Cropland (maize)                              | 2017–2022   |
| ARou         | AR  | 38.0444°N,<br>100.4647°E | Grassland                                     | 2019–2023   |
| GuCheng      | GC  | 39.1486°N,<br>115.7351°E | Cropland (winter wheat<br>and maize rotation) | 2020–2022   |

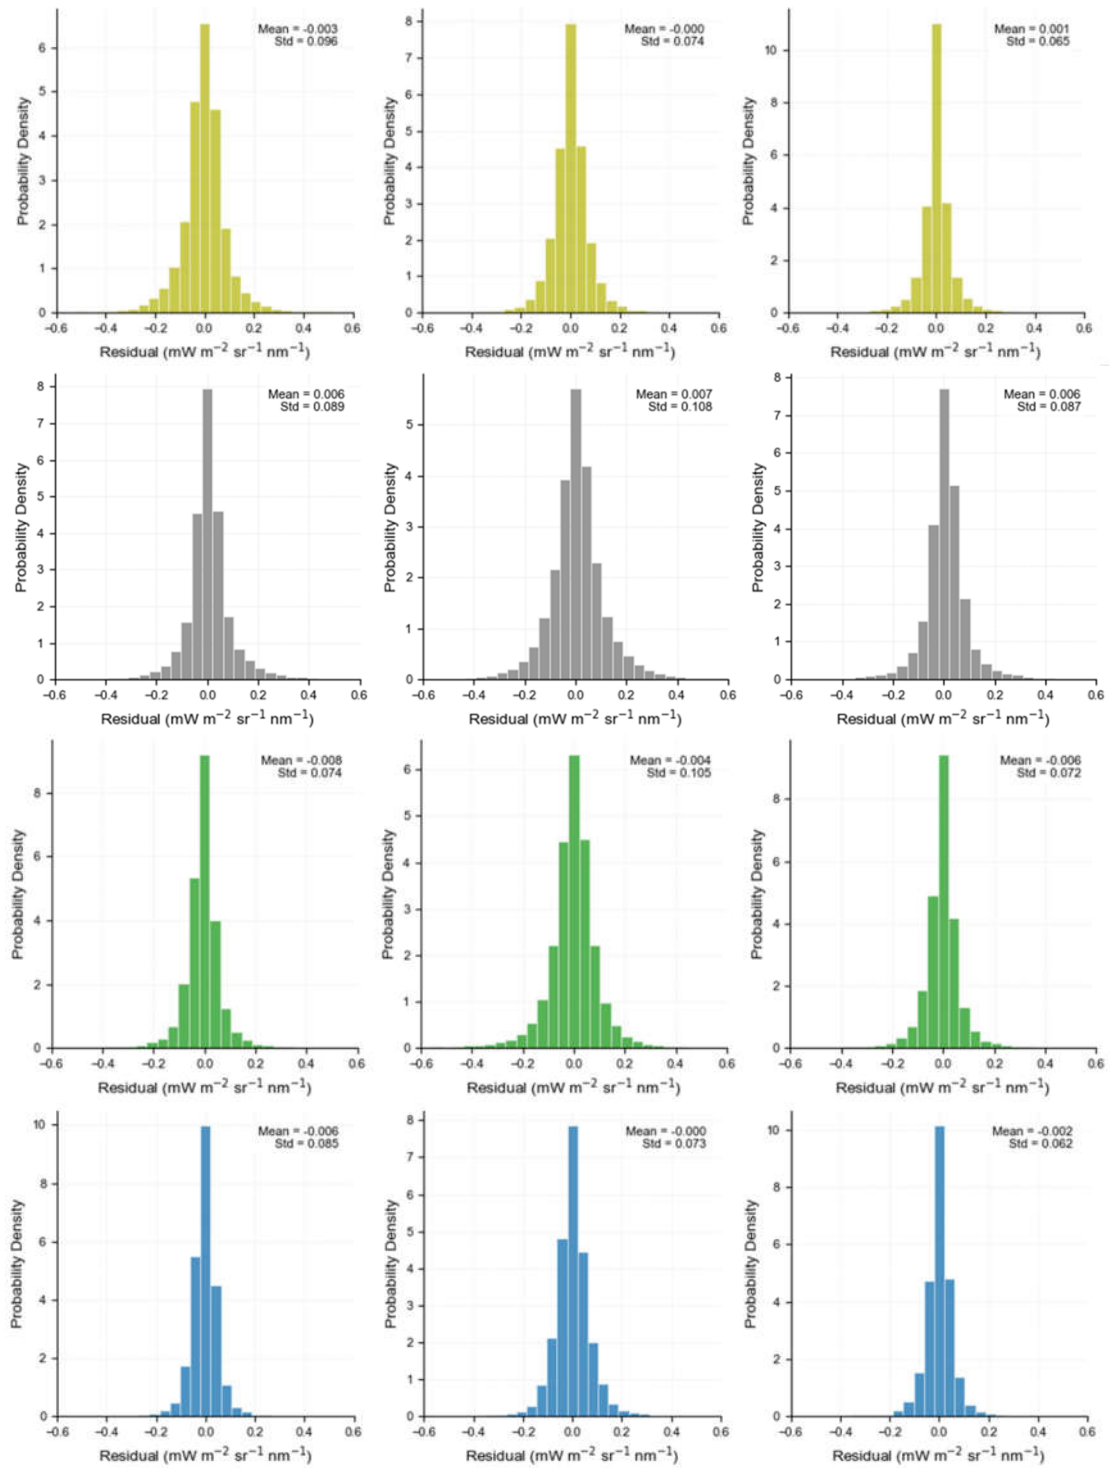

Figure S2 The histograms of the downscaling residual of GOME (1996, first line), SCIAMACHY (2008, second line), GOME-2 (2014, third line), and OCO-2 (2018, last line). The left, middle, and right columns represent results in January, July, and December, respectively.

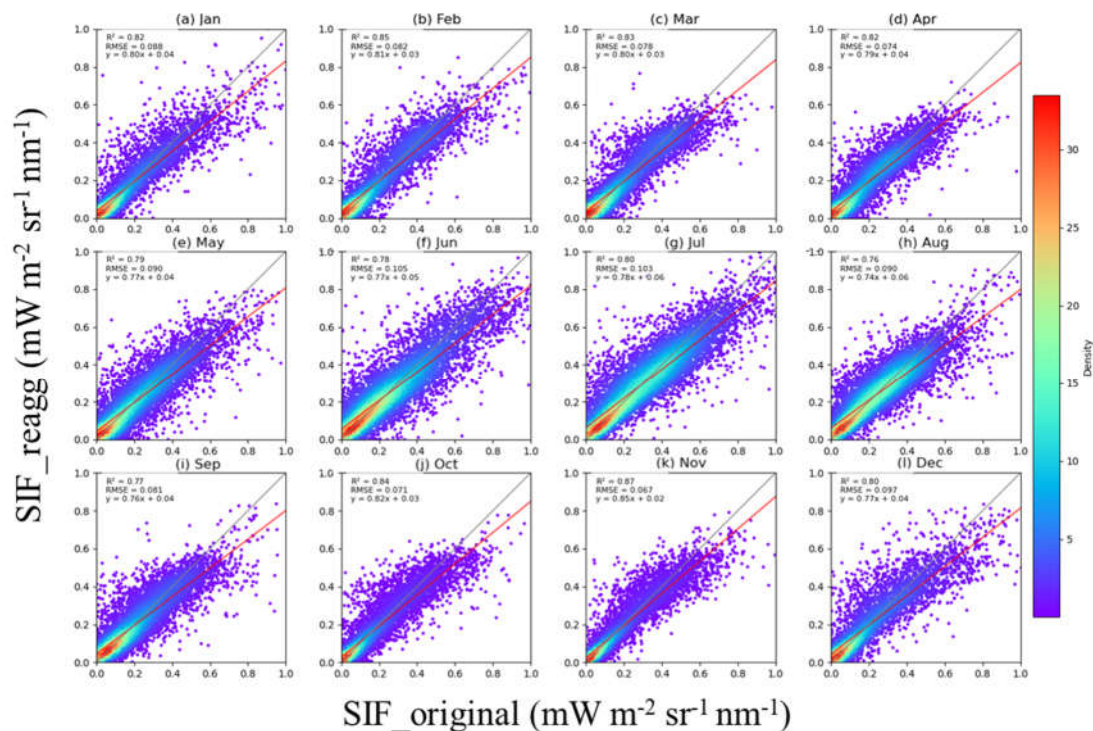

Figure S3 The relationship between the re-aggregated SCIAMACHY SIF ( $SIF_{reagg}$ ) and coarse spatial resolution SCIAMACHY SIF ( $SIF_{original}$ ) for different months in 2007.

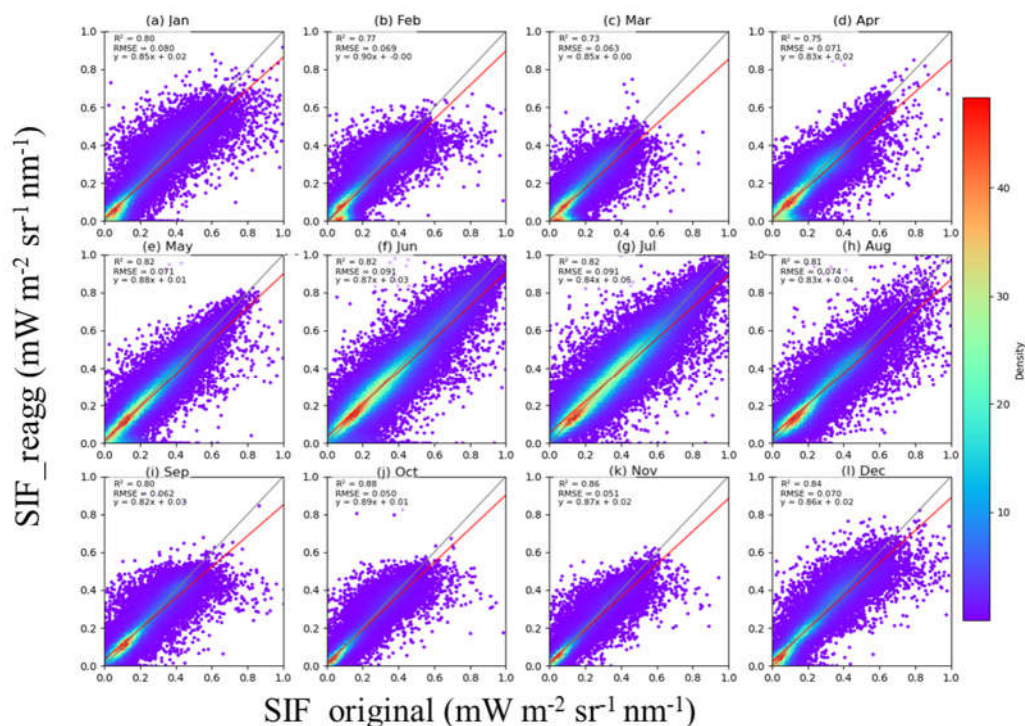

Figure S4 The relationship between the re-aggregated GOME-2 SIF ( $SIF_{reagg}$ ) and coarse spatial resolution GOME-2 SIF ( $SIF_{original}$ ) for different months in 2007.

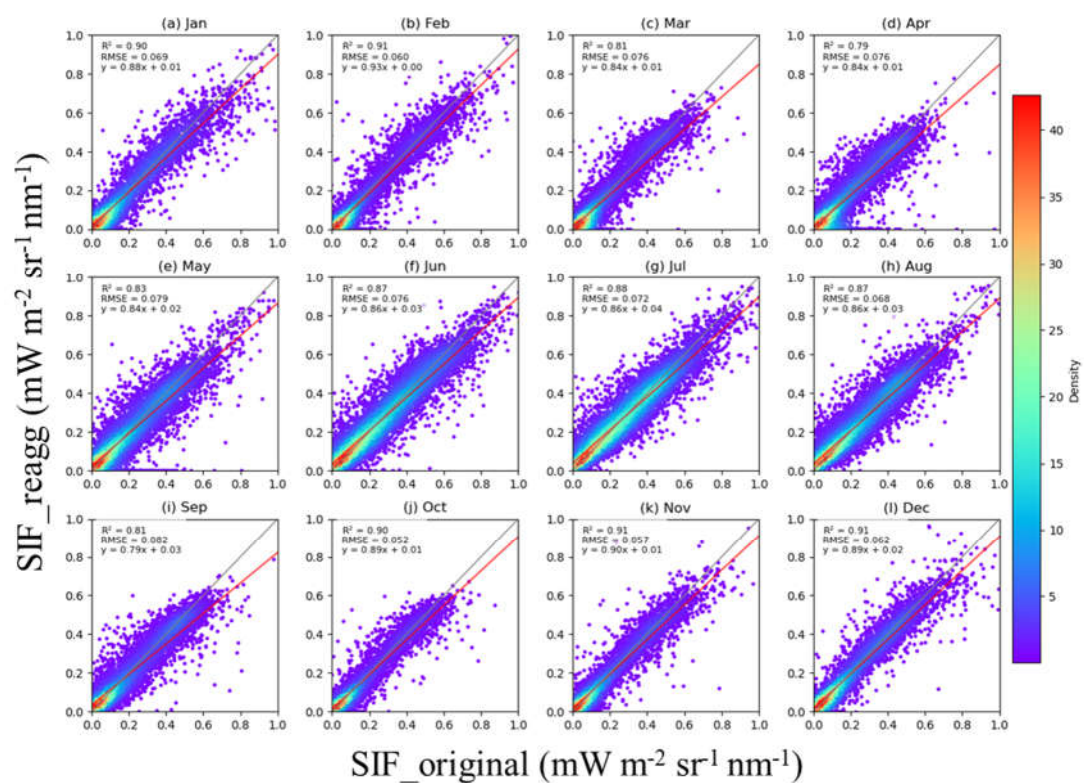

Figure S5 The relationship between the re-aggregated OCO-2 SIF ( $SIF\_reagg$ ) and coarse spatial resolution OCO-2 SIF ( $SIF\_original$ ) for different months in 2015.
